# Supplementary material for: Eugenol β-Amino/β-Alkoxy Alcohols with Selective Anticancer Activity
Source: MDPI journal article supplement (doi:10.3390/ijms23073759), 2022-03-29
Supplement: s1 [file s1]

## Supplementary Material

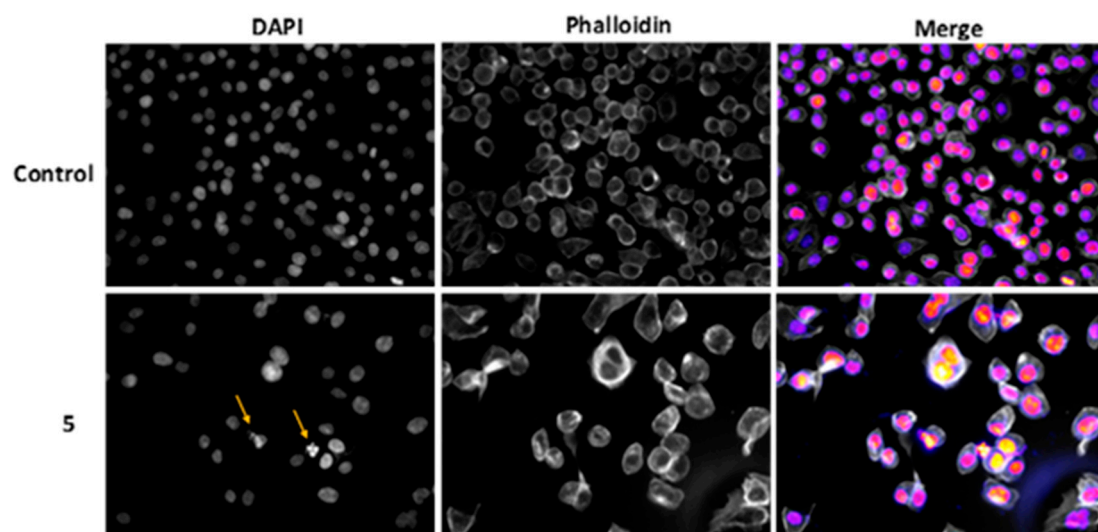

**Figure S1** - Morphological assessment of AGS cells incubated with 5 (100  $\mu$ M, 24h). DNA was studied using DAPI and overall cell morphology with phalloidin. Yellow arrows: chromatin fragmentation.

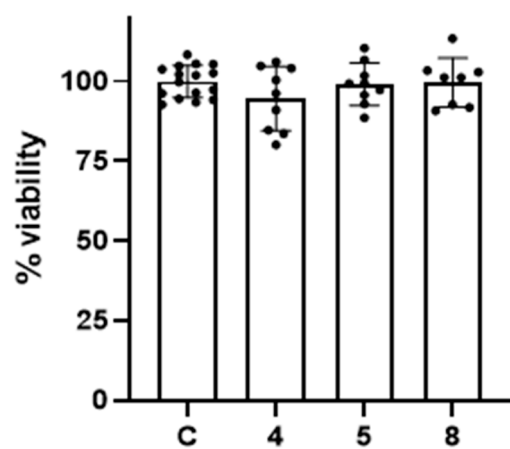

**Figure S2** - Viability of HaCaT cells exposed to molecules 4, 5 and 8 at 100  $\mu$ M. The results correspond to the mean of each well of three independent experiments performed in triplicate. C: control.
